# Supplementary material
Source: Springer Nature journal article supplement (https://www.springermedizin.de/resource/supplementary/13075_2009_2818_MOESM9_ESM.pdf/9692952)

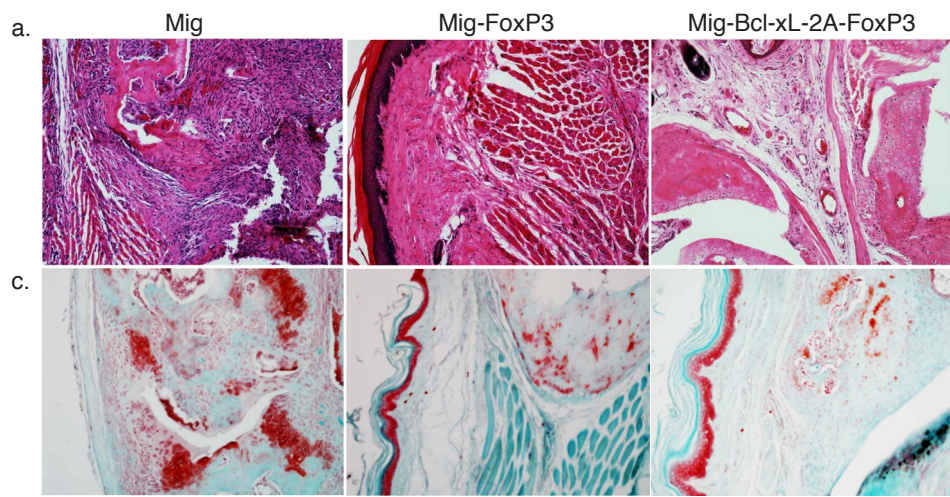

**b.**

Semi-quantitative score

**d.**

Mig

Mig-FoxP3

Mig-Bcl-xL-2A-FoxP3

Supplement: MOESM9 [file 9692952]
